# Supplementary material for: Three-dimensional hyperbranched PdCu nanostructures with high electrocatalytic activity
Source: Royal Society of Chemistry journal article supplement (doi:10.1039/c5cc08581k), 2015-11-12
Supplement: c5cc08581k1.pdf [file c5cc08581k1.pdf]

## **Three-Dimensional Hyperbranched PdCu Nanostructures with Highly Electrocatalytic Activity**

Bo Jiang,<sup>a,b</sup> Cuiling Li,<sup>\*a</sup> Victor Malgras,<sup>a</sup> Yoshio Bando<sup>a</sup> and Yusuke Yamauchi<sup>\*a,b</sup>

- a World Premier International (WPI) Research Center for Materials Nanoarchitectonics (MANA), National Institute for Materials Science (NIMS), 1-1 Namiki, Tsukuba, Ibaraki 305-0044 (Japan)
- b Faculty of Science and Engineering, Waseda University, 3-4-1 Okubo, Shinjuku, Tokyo 169-8555 (Japan)

## Characterization

The scanning electron microscope images (SEM) were obtained with a Hitachi SU-8000 microscope operated at 5 kV. The transmission electron microscopy (TEM) and high-angle annular dark-field scanning TEM (HAADF-STEM) characterizations were carried out using a JEOL JEM-2100F operated at 200 kV equipped with an energy-dispersive spectrometry analyzer. The samples for TEM and HRTEM characterizations were prepared by depositing a drop of the diluted colloidal suspension on a grid. Wide-angle powder X-ray diffraction (XRD) spectrum was acquired with a Rigaku Rint 2500 diffractometer with monochromated Cu K radiation. Low-angle XRD profiles were obtained by using a NANO VIEWER (Rigaku, Japan) equipped with a Micro Max-007 HF high-intensity micro-focus rotating anode X-ray generator. X-ray photoelectronic spectroscopy (XPS) spectra was carried out at room temperature by using a JPS-9010TR (JEOL) instrument with an Mg K $\alpha$  X-ray source. All the binding energies were calibrated via referencing to C 1s binding energy (284.6 eV).

## Electrochemical Characterization

Cyclic voltammograms (CV) and chronoamperometric (CA) experiments were performed using a CHI 842B electrochemical analyzer (CHI Instruments, USA). A conventional three-electrode cell was used, including an Ag/AgCl (saturated KCl) reference electrode, a platinum wire as a counter electrode, and a modified glassy carbon electrode (GCE) as a working electrode. The modified GCE was coated with the as-prepared samples (5.0  $\mu$ g) and dried at room temperature. Then, 5.0  $\mu$ l of Nafion (0.05 wt%) was coated on the surface of the modified GCE and dried before the electrochemical measurements. Prior to electrochemical measurements, the GCE modified with the as-prepared sample was activated electrochemically by cycling the electrode potential between -0.2 V and +1.2 V (vs Ag/AgCl) in 0.5 M HClO<sub>4</sub>. Formic acid electro-oxidation measurements were performed in a solution of 0.5 M HClO<sub>4</sub> containing 0.5 M formic acid at a scan rate of 50 mV s<sup>-1</sup>. Mass current densities were normalized by the loaded Pd amount, which was determined by inductively coupled plasma mass spectroscopy (ICP-MS).

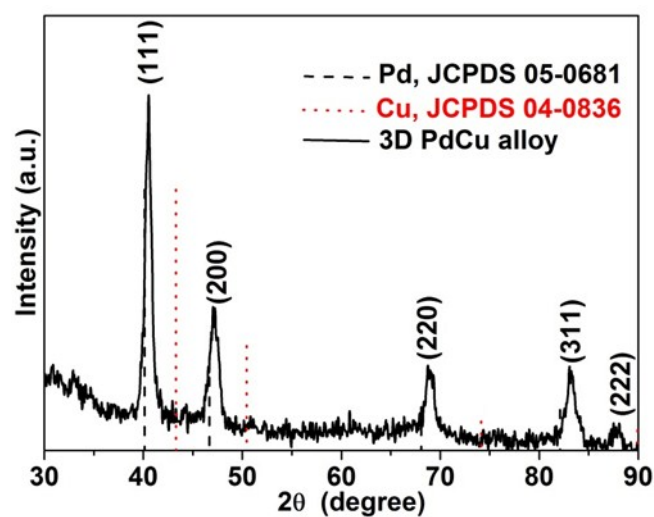

Fig. S1 Wide-angle XRD pattern of the 3D branched PdCu nanostructures.

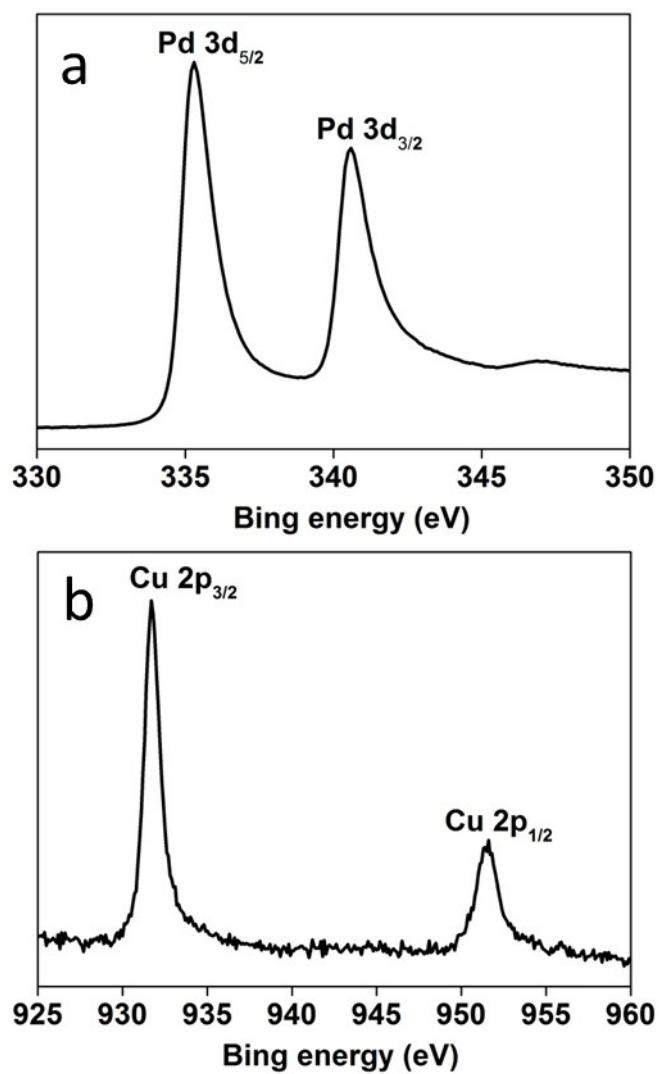

Fig. S2 High resolution XPS spectra for a) Pd 3d, b) Cu 2p of the 3D branched PdCu nanostructures.

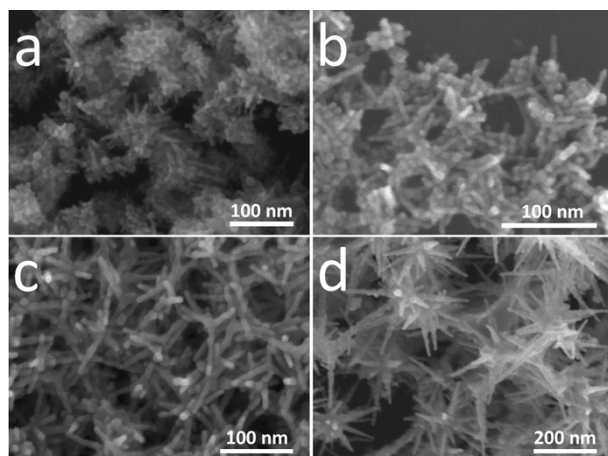

**Fig. S3** SEM images of the samples prepared with different amounts of KBr: a) 0 mg, b) 10 mg c) 80 mg, and d) 150 mg.

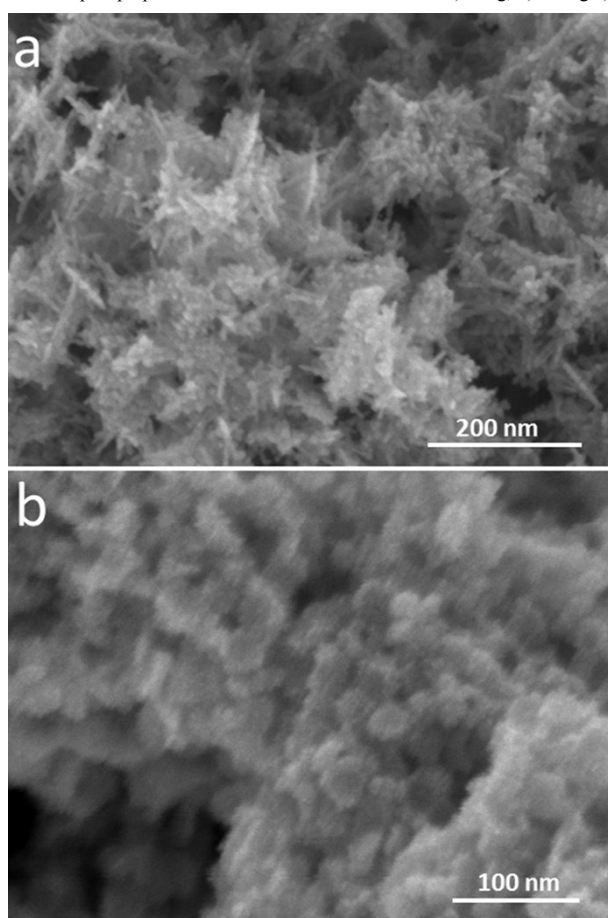

**Fig. S4** SEM images of the samples prepared by replacing KBr with a) KCl and b) KI.

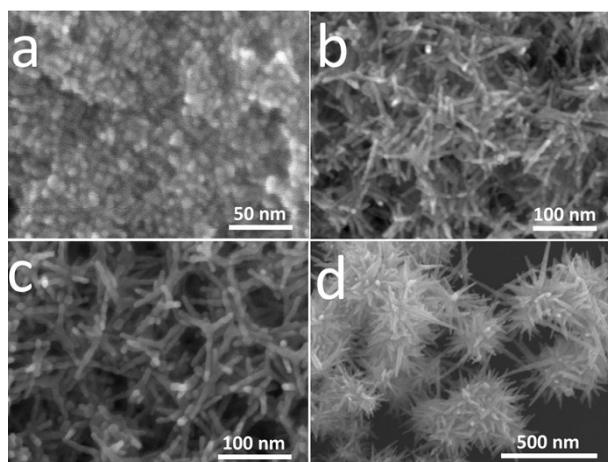

**Fig. S5** SEM images of the samples prepared with different amounts of HCl: a) 0 mmol, b) 0.3 mmol c) 0.6 mmol, and d) 1.2 mmol.

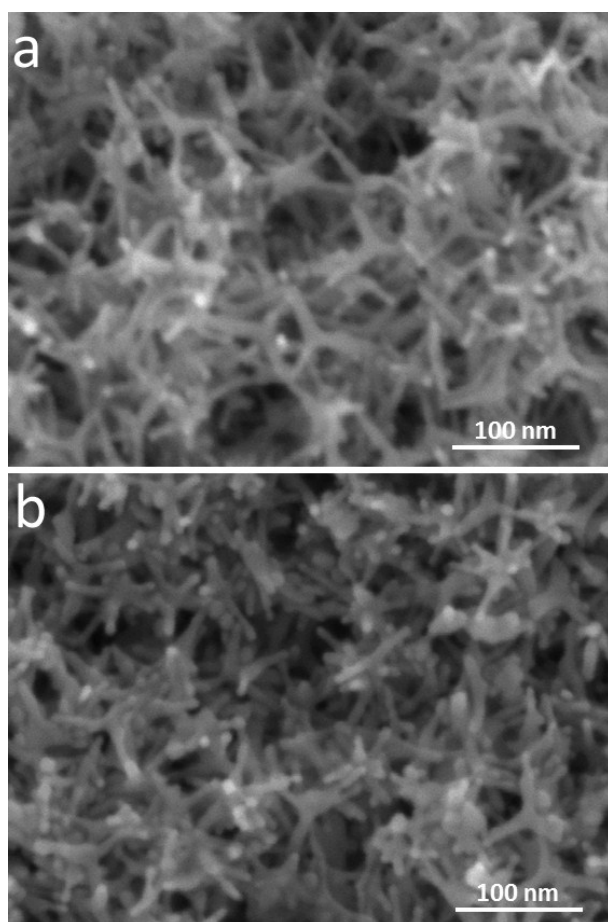

**Fig. S6** SEM images of the samples prepared by replacing HCl with a)  $\text{HNO}_3$  and b)  $\text{H}_2\text{SO}_4$ .

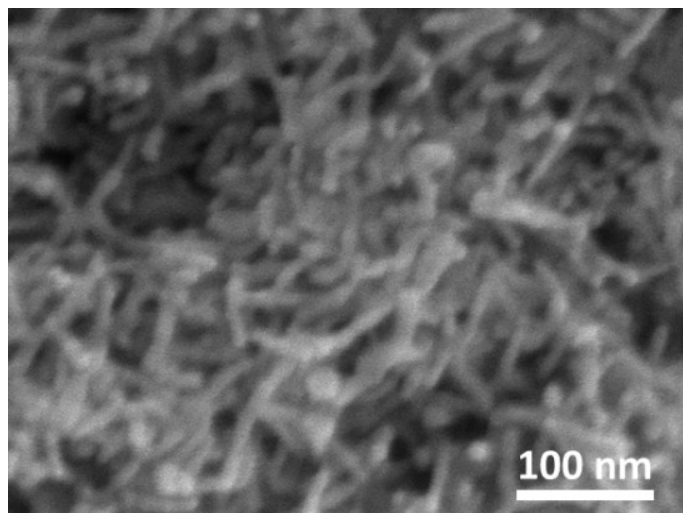

**Fig. S7** SEM image of the sample after electrocatalyzing formic acid oxidation for 1000 s.

**Table S1.** Comparison of the surface area and the activity of 3D branched PdCu nanostructure with previous reported Pd-based catalysts.

| Sample name                               | Surface area<br>(m <sup>2</sup> g <sup>-1</sup> ) | Condition                                             | Scan rate<br>(mV s <sup>-1</sup> ) | Mass activity<br>(A mg <sup>-1</sup> _Pd) | Reference    |
|-------------------------------------------|---------------------------------------------------|-------------------------------------------------------|------------------------------------|-------------------------------------------|--------------|
| 3D branched PdCu alloy                    | 76.9                                              | 0.5 M HClO <sub>4</sub> +<br>0.5 M HCOOH              | 50                                 | 1.84                                      | Present work |
| Mesoporous Pd film                        | --                                                | 0.5 M H <sub>2</sub> SO <sub>4</sub> +<br>0.5 M HCOOH | 50                                 | 0.93                                      | [S1]         |
| Pd/Graphite Oxide                         | 41.8                                              | 0.5 M H <sub>2</sub> SO <sub>4</sub> +<br>0.5 M HCOOH | 50                                 | 0.90                                      | [S2]         |
| Single crystalline Pd tripods             | 20                                                | 0.5 M H <sub>2</sub> SO <sub>4</sub> +<br>0.5 M HCOOH | 50                                 | 0.49                                      | [S3]         |
| Branched Pd tertrapods                    | --                                                | 0.5 M H <sub>2</sub> SO <sub>4</sub> +<br>0.5 M HCOOH | 50                                 | 0.37                                      | [S4]         |
| Pd-P nanoparticle networks                | 18.9                                              | 0.5 M H <sub>2</sub> SO <sub>4</sub> +<br>0.5 M HCOOH | 50                                 | 0.61                                      | [S5]         |
| Nanobranched porous Pd-Sn                 | 18.6                                              | 0.5 M H <sub>2</sub> SO <sub>4</sub> +<br>0.5 M HCOOH | 50                                 | 0.98                                      | [S6]         |
| Nanowire PdNi/Graphite Oxide              | 98.2                                              | 0.5 M H <sub>2</sub> SO <sub>4</sub> +<br>0.5 M HCOOH | 50                                 | 0.94                                      | [S7]         |
| PdCo nanoassemblies                       | --                                                | 0.5 M H <sub>2</sub> SO <sub>4</sub> +<br>0.5 M HCOOH | 50                                 | 0.28                                      | [S8]         |
| Mono-dispersed PdCu nanoparticle          | --                                                | 0.1 M H <sub>2</sub> SO <sub>4</sub> +<br>0.5 M HCOOH | 50                                 | 0.35                                      | [9]          |
| Ideal Pd nanowires with 10 nm in diameter | 33                                                | --                                                    | --                                 | --                                        | [10]         |

## Reference

- [S1] C. Li, B. Jiang, N. Miyamoto, J. H. Kim, V. Malgras, Y. Yamauchi, *J. Am. Chem. Soc.*, 2015, **137**, 11558.
- [S2] X. Gao, F. Li, Y. Li, S. Li, Y. Chen, J. M. Lee, *J. Power Sources*, 2015, **280**, 491.
- [S3] N. Su, X. Chen, Y. Ren, B. Yue, H. Wang, W. Cai, H. He, *Chem. Commun.*, 2015, **51**, 7195
- [S4] R. Zhao, G. Fu, T. Zhou, Y. Chen, X. Zhu, Y. Tang, T. Lu, *Nanoscale*, 2014, **6**, 2776.
- [S5] J. Zhang, Y. Xu, B. Zhang, *Chem. Commun.*, 2014, **50**, 13451.
- [S6] D. Sun, L. Si, G. Fu, C. Liu, D. Sun, Y. Chen, Y. Tang, T. Lu, *J. Power Sources*, 2015, **280**, 141.
- [S7] D. Bin, B. Yang, F. Ren, K. Zhang, P. Yang, Y. Du, *J. Mater. Chem. A*, 2015, **3**, 14001.
- [S8] L. Zhang, L. Wan, Y. Ma, Y. Chen, Y. Zhou, Y. Tang, T. Lu, *Appl. Catal. B*, 2013, **138**, 229.
- [S9] K. H. Park, Y. W. Lee, S. W. Kang, S. W. Han, *Chem. Asian J.*, **2011**, **6**, 1515.
- [S10] Assuming cylindrical Pd nanowires (with 10 nm in diameter) with smooth surface, we theoretically calculated the surface area.
